# Supplementary material for: Impact of Brewers’ Spent Grain-Containing Biscuit on Postprandial Glycaemic Response in Individuals with Metabolic Syndrome: A Crossover Randomised Controlled Trial
Source: MDPI journal article supplement (doi:10.3390/nu16060909), 2024-03-21
Supplement: s1 [file s1]

**Table S1.** Normalized AUC of TC, HDL-C and LDL-C, and positive iAUC and net iAUC of TG.

| Biomarker                                 | Control                     | ABSG                        | FBSG                        |
|-------------------------------------------|-----------------------------|-----------------------------|-----------------------------|
| TC negative iAUC (mmol/L $\times$ min)    | 1657 $\pm$ 282 <sup>a</sup> | 1278 $\pm$ 192 <sup>a</sup> | 1394 $\pm$ 220 <sup>a</sup> |
| HDL-C negative iAUC (mmol/L $\times$ min) | 731 $\pm$ 108 <sup>a</sup>  | 671 $\pm$ 78 <sup>a</sup>   | 664 $\pm$ 65 <sup>a</sup>   |
| LDL-C negative iAUC (mmol/L $\times$ min) | 2659 $\pm$ 440 <sup>a</sup> | 2445 $\pm$ 371 <sup>a</sup> | 2463 $\pm$ 294 <sup>a</sup> |
| TG positive iAUC (mmol/L $\times$ min)    | 106 $\pm$ 16 <sup>a</sup>   | 114 $\pm$ 23 <sup>a</sup>   | 105 $\pm$ 15 <sup>a</sup>   |

Values are presented as mean  $\pm$  standard error. *P* value was determined by repeated measured one-way ANOVA with post-hoc Bonferroni test. Different alphabet superscripts indicate a significant difference across the comparisons within the same row. Superscript a indicates the highest group across the row. Control: control biscuit; ABSG: autoclaved brewers' spent grain -containing biscuit; FBSG: fermented brewers' spent grain -containing biscuit. TC: total cholesterol; HDL-C: high-density lipoprotein cholesterol; LDL-C: low-density lipoprotein cholesterol; TG: triglyceride; AUC: area under the curve; iAUC: incremental area under the curve.

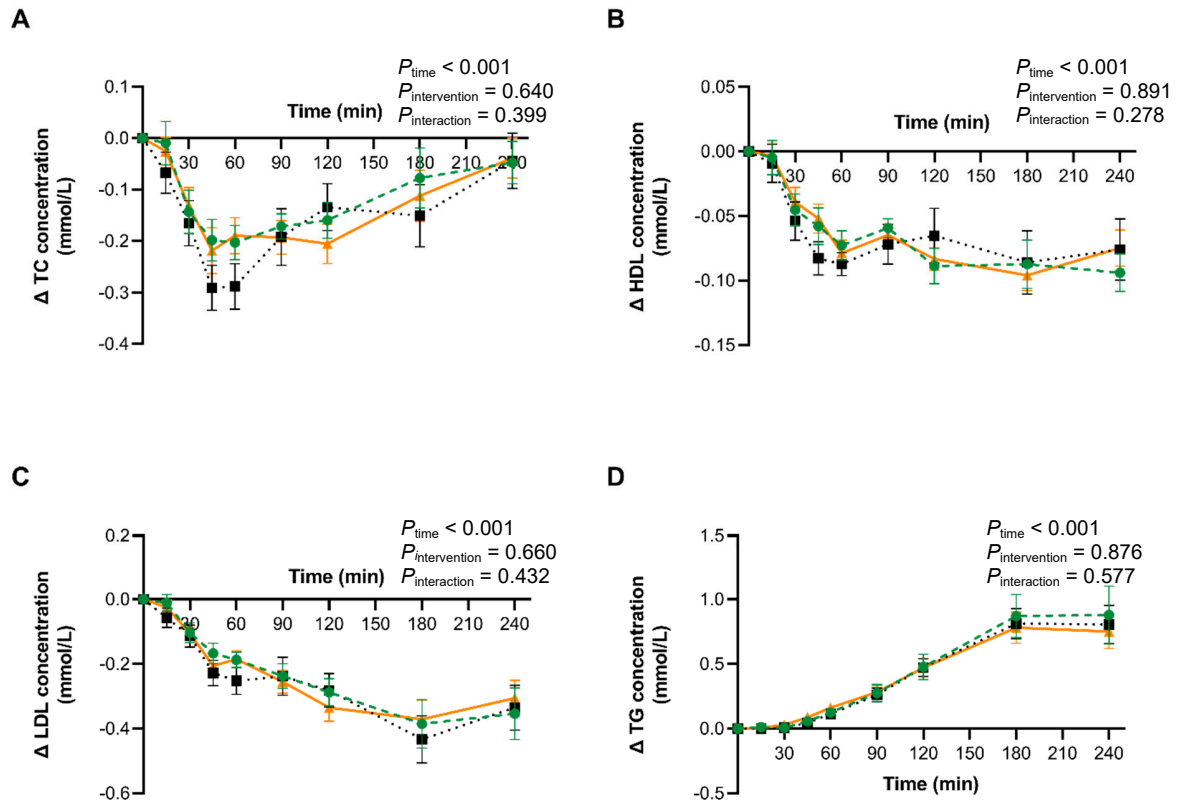

**Figure S1.** Change from baseline of (A) postprandial TC concentration. (B) postprandial HDL-C concentration. (C) postprandial LDL-C concentration. (D) postprandial TG concentration. Control is in black dotted lines, ABSG is in green dashed lines, FBSG is in orange solid lines. *P* value was determined by two-way repeated measures ANOVA with Wilcoxon test considering Bonferroni correction. Control: control biscuit; ABSG: autoclaved brewers' spent grain - containing biscuit; FBSG: fermented brewers' spent grain - containing biscuit. TC: total cholesterol; HDL: high-density lipoprotein cholesterol; LDL: low-density lipoprotein cholesterol; TG: triglyceride.

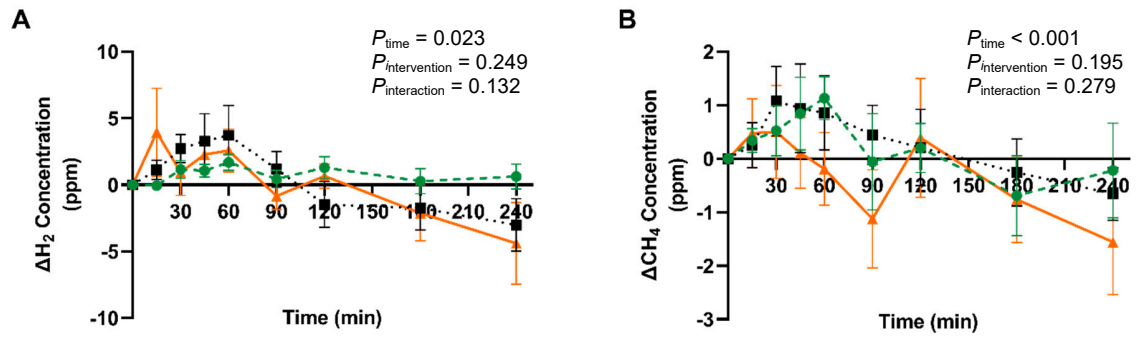

**Figure S2.** Change from baseline of **(A)**  $H_2$  concentration. **(B)**  $CH_4$  concentration. Control is in black dotted lines, ABSG is in green dashed lines, FBSG is in orange solid lines.  $P$  value was determined by two-way repeated measures ANOVA with Wilcoxon test considering Bonferroni correction. Control: control biscuit; ABSG: autoclaved brewers' spent grain -containing biscuit; FBSG: fermented brewers' spent grain -containing biscuit.

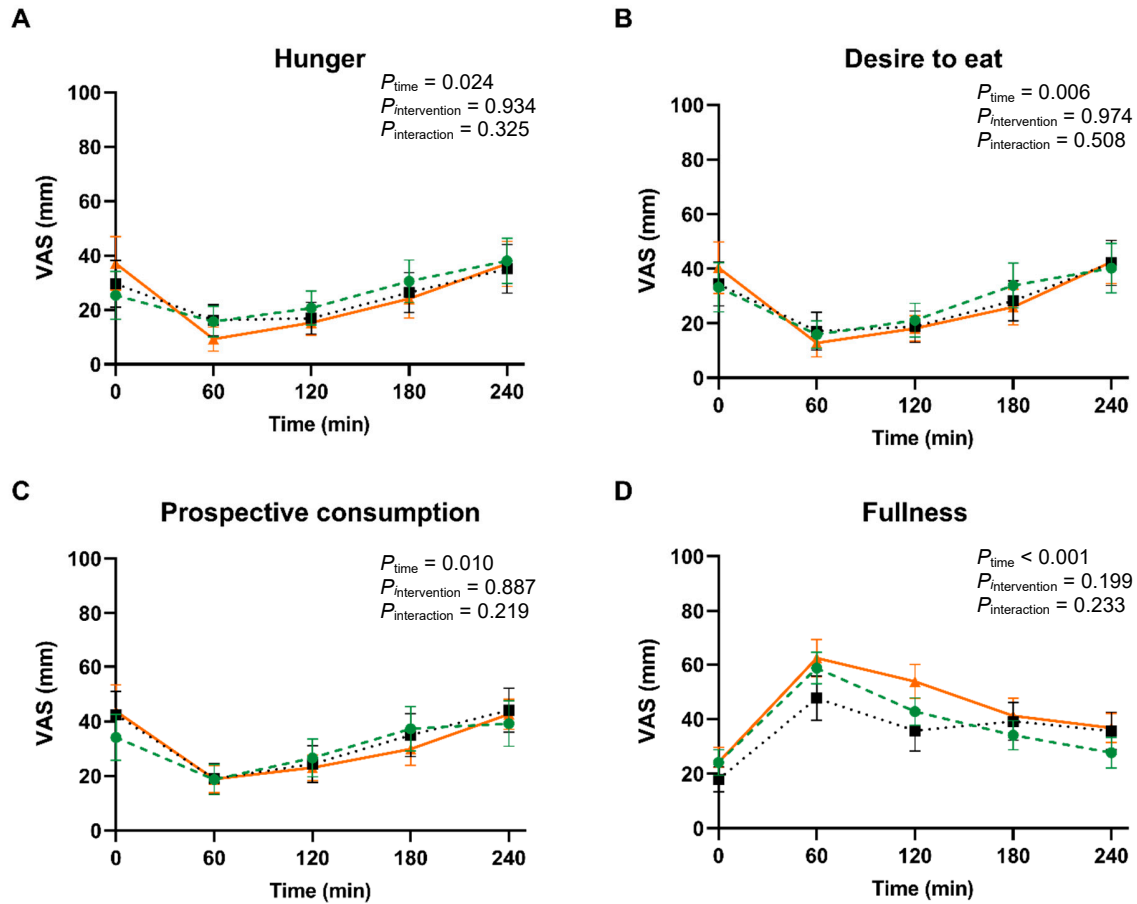

**Figure S3.** VAS score of subjective satiety assessment: **(A)** Hunger. **(B)** Desire to eat. **(C)** Prospective consumption. **(D)** Fullness. Control is in black dotted lines, ABSG is in green dashed lines, FBSG is in orange solid lines.  $P$  value was determined by two-way repeated measures ANOVA with Wilcoxon test considering Bonferroni correction. VAS: visual analogue scale; Control: control biscuit; ABSG: autoclaved brewers' spent grain -containing biscuit; FBSG: fermented brewers' spent grain -containing biscuit.
